# Supplementary material for: Multispecies Fisheries in the Lower Amazon River and Its Relationship with the Regional and Global Climate Variability
Source: PLoS One. 2016 Jun 17;11(6):e0157050. doi: 10.1371/journal.pone.0157050 (PMC4912141; doi:10.1371/journal.pone.0157050)
Supplement: S2 Dataset — Dataset of CPUE in the floodplain lakes for fishing grounds in Óbidos, Santarém and Monte Alegre and taxonomic families of fish. (AN) Anostomidae, (SR) Serrasalmidae, (CI) Cichlidae, (HY) Hypophthalmidae, (LR) Loricariidae, (PI) Pimelodidae, (PC) Prochilodontidae, (SC) Sciaenidae, (DR) Doradidae, (CL) Clupeidae. (XLSX) [file pone.0157050.s002.xlsx]

## Sheet: Lake
	Lake CPUE
	Obidos										Santarem										Monte Alegre
	AN.	SR	CI	HY	LR	PI	PC	SC	DR	CL	AN.	SR	CI	HY	LR	PI	PC	SC	DR	CL	AN.	SR	CI	HY	LR	PI	PC	SC	DR	CL
1993-01-01		2.27273	2.08333	4.76093		2.02922	2.69174	2.27273	2.68182		4.91414	3.43011	3.26474	10.1421	6.9246	3.89405	3.28797	3.89472	0.998246		4.1575	3.47974	4.2396	12.6263	18.0047	2.05125	3.7213	2.89902	1.57573
1993-02-01		3.07143		3.90625		3.28646	1.78571	1.78571	2.14286		3.94796	4.19001	4.63563	9.58157	37.2872	4.66365	5.78668	3.58842	3.00694	2.521	2.87825	3.19918	1.11719	11.0637	13.7587	2.36392	4.09752	1.8401	2	3.33333
1993-03-01		15	3.33333	7.62239		5		4.49735	7.14286		4.01651	3.57204	1.86596	11.4253	25.7834	2.42181	5.14934	3.55845	0.889582	3.57541	4.84685	5.1084	1.42381	16.0018	22.7259	5.29502	5.02395	3.90772	1.33036	2.85714
1993-04-01			0.340909	1.13636		13.75			1.13636		4.30283	4.56877	0.981424	6.45825	22.622	4.00299	4.10326	6.02256	0.386855	0.912484	4.4891	7.64483	0.464286	10.4303	24.6005	4.00475	5.3288	4.34316	0.397363	2.1867
1993-05-01				16.6667		10		15.8333		1.66667	2.49401	2.40084	0.798211	16.6005		0.783793	7.26373	2.39476	0.202994	0.800247	1.86349			26.3468	15.2333	2.23311	2.84722	5.80698	0.173077	1.39693
1993-06-01											2.40332	3.6215	1.54167	9.91956	5.80634	1.0536	10.7462	4.89115	0.054814	0.521362	1.81531	7.14489		4.57096	7.48912	5.48539	3.63636	4.08204		0.2
1993-07-01	2.09402		0.555556	1.85185		4.61538	1.2963	5.55556			6.26179	2.5457	3.73702	15.7559	5.31978	5.32901	1.17474	8.87949	1.60461	1.36183	9.77083	0.4	1.25	21.3511	6.49835	3.26582		5.1703	0.7
1993-08-01	4.36508					11.9907		4.36508		8.33333	9.50949	3.40954	2.5247	14.3115	6.28205	14.5742	5.492	6.33175	0.431404	5.59571	12.963	5.75634		25.8953	11.5893	4.10815	1.38889	6.28172	3.125
1993-09-01		11.414	7.25	0.18125	26.334	4.68039	5.46959	0.75	3.04062		8.62724	5.4484	2.05551	10.0834	17.7444	9.46842	3.83536	6.18297	1.59316	6.74056	6.25	3.61545	2.88422	12.4484	17.5339	2.24095	3.17514	3.4488	3.38601
1993-10-01		5	15		45.7233	17.5	10	3.95833	5		11.2847	5.16477	3.41972	2.9478	14.7646	4.39876	5.23575	9.96233	0.416717	10.3405	1.88889	4.55939	1.10902		9.53662	3.06904	4.83331	3.93396	2.27249	1.20833
1993-11-01			30		9.9913	4.05417	16.7134	9.5	0.3	2	10.3197	4.76262	4.46416	4.94335	5.67111	6.63989	6.38613	10.5025	6.16452	12.0833	5.15579	3.16381	1.96926	3.65026	14.6683	2.87092	4.61077	4.95524	2.67377
1993-12-01		2.38095	2	11.9048		7.275	3.57143	11.1969	6.25		10.627	7.95754	1.30987	7.52933	9.28361	4.15698	2.0933	8.97347	3.55496	5.33542	5.6201	3.44529	2.77241	7.71849	19.0577	2.18346	5.05054	6.58363	2.67702
1994-01-01				3.28947							6.74056	3.37574	2.5085	10.2646	8.55704	5.00414	5.40145	5.95418	5.09359	3.33695	17.7429	4.23232	2.3371	9.80344	15.4496	4.99729	4.23987	12.0333	2.01999	6.85714
1994-02-01	14.6875	2		25.2926		0.28		20.9596	0.75		6.07405	2.06709	2.06861	16.2103	4.48617	3.28177	4.03168	8.48396	1.61612	6.06944	1.96909	5.49711	1.35093	7.32735	16.8822	1.60793	2.73485	4.84239	0.792992	1.74504
1994-03-01	5.75195	6.54667	2.5	21.7585		4.15084	4.27714	6.34037		4.81023	4.67897	6.08689	3.00225	18.5859	12.3116	8.09465	6.09357	5.7577	1.37184	4.28355	4.75152	3.69091	0.75583	26.5942	10.4167	20.7261	3.36954	2.79117	0.69819	1.2939
1994-04-01	6.38234	6.87146		13.8259		3.10723	5.60055	5.18614		2.8874	4.80419	6.019	2.06311	21.9011	2.33619	1.25247	4.49037	4.01414	0.224687	2.0134	4.75484	9.02361	4.73421	10.3174	8.31139	17.5941	6.26371	2.78579	0.734848	1.97925
1994-05-01		2.40043		50.5703	7.42625	1.23862	3.60773	1.26044			6.01123	4.80566	5.21767	12.3998	4.37037	2.1812	5.26974	4.27061	1.18312	1.02693	4.22271	8.46349	1.92	11.3189	2.19282	17.1203	5.25864	2.67594	0.571351	0.662424
1994-06-01	4.3375	3.2896		9.8156		1.76228	2.22				3.70419	3.37712	1.36247	12.8267	4.71981	1.11622	4.76258	3.2104	0.71681	0.6742	5.11993	4.54659	1.57654	15.3174	10.1845	14.8547	3.74729	3.80662	1.80556	3.12104
1994-07-01	17.5	4.36759		6.73268		0.863363	13	11.1111			2.27573	9.02406	1.25311	10.2582	2.87068	2.26745	4.26469	3.39847	0.388335	1.88452	4.05248	1.27766	2.38419	15.5014	16.8591	16.1221	5.85971	4.73419	1.9927	4.58239
1994-08-01	4.69576	17.4312		19.4444		30.5556	18.5185			4.7619	4.31659	4.60107	2.22408	15.2139	5.64646	3.63791	9.60734	5.23464	0.361111	2.38629	2.86354	6.56925	2.34392	8.41679	14.0504	5.08491	6.82793	2.50683	2.25793	1.39078
1994-09-01	12.5	14.138		10.1852		7.38235	34.2262	10.5		7.5	6.26541	8.78301	3.28491	18.2897	12.2632	5.76884	8.57116	5.36994	1.05631	2.77416	9.06416	6.3001	2.32674	20.1208	14.7074	11.9152	11.298	7.51281	13.1414	4.46855
1994-10-01		17.1429					111.111				3.90764	6.78912	3.26108	14.6265	8.19952	8.10793	10.8523	5.49129	1.78333	3.56862	8.91495	9.88269	4.34183	34.75	9.04883	7.03082	8.7985	4.38229	1.95366	1.70833
1994-11-01		8.43799			13.9889	2.599	8.125	3.875			4.30833	4.31699	4.62346	10.671	7.79121	3.89767	10.8201	2.97163	1.73623	4.36261	8.66924	6.08974	4.69131	10.375	12.1014	12.893	14.9018	5.37062	1.13042	2.5
1994-12-01			3.3099	20.875	3.97188	9.78571	10.7143		3.28125		3.56901	3.03948	1.81254	18.6781	8.0434	4.20812	6.21885	4.56535	2.85166	4.03678	5.11656	5.05622	5.35285	9.88285	16.1318	4.50693	9.77216	5.44137	1.56263	4.14347
1995-01-01			18.3333	18.4375		18.75		9.75		1	2.48163	2.58464	1.57206	9.29693	7.78091	2.74284	1.9068	5.53966	2.48486	4.49322	15.2146	3.07506	3.69254	9.93586	7.62208	3.33122	3.25861	6.18491	1.3076	6.40556
1995-02-01			8.93056	15.1562	14.6889	0.833333			1.27778		2.80696	1.73114	3.5108	23.2301	9.06825	8.12591	8.09547	5.75612	2.35185	3.91238	8.195	4.03894	2.26173	5.47019	3.95061	1.8756	3.09303	4.13734	3.32568	5.9246
1995-03-01		2.8125	1.90179		32.2292	3.21346	12.5		0.75		3.36262	2.64861	1.57694	13.8389	7.79987	1.30393	4.62117	4.26331	1.00505	1.6833	3.37505	11.1846	3.26994	17.4312	5.36278	16.6782	4.72205	6.60494	1.91259	8.7132
1995-04-01		12.2222									4.49912	4.80865	3.19431	15.9842	4.81356	2.18351	3.76922	5.91457	1.16526	2.29396	3.56231	3.93447	1.60519	10.6941	1.64673	11.0303	4.784	4.63601	0.667071	5.74315
1995-05-01		12				10.75					3.0155	4.13624	2.56928	12.5097	7.44853	11.3113	4.4745	4.01949	0.938359	3.22653	1.99426	6.26226	2.39583	10.1183	7.97036	8.88309	5.10184	2.57128	2.1849	6.60594
1995-06-01				24.4583							4.29905	3.31909	2.22597	28.0351	9.0513	18.533	3.24015	3.0359	2.09401	2.10546	3.91795	2.63693	3.3	31.4407	10.1084	6.38452	4.67892	3.28052	1.60722	4.22913
1995-07-01											3.27231	1.38146	1.32913	25.9881	8.64922	12.3876	3.62342	2.47389	0.455116	1.68588	2.15021	1.44824	0.90445	7.1126	11.1635	7.90501	2.42748	5.02826	4.5202	7.98611
1995-08-01											5.45304	4.89073	2.73231	40.3535	8.68683	8.23871	3.72767	2.99711	0.837562	3.24073	5	8.32498	1.53488	1.33333	13.2152	4.35736	5.59766	1.34512	1.82806
1995-09-01		8.125	12.5			10.2765	5.41667		2.24242		6.05645	4.50271	4.23866	25.5487	4.43594	7.03721	4.88572	3.12719	2.44499	1.96017		4.26836	2.59368		9.6871	14.3141	7.70934	7.45475		4.375
1995-10-01		1.66667			2.12666		5				5.94149	5.24001	7.43725	25.7143	6.25327	18.1952	6.67095	6.47036		2.03854		5.34251	4.19866		19.4043	7.45715	9.74449	6.28823	0.47619
1995-11-01		12.45									5.21622	4.24031	3.49989		6.29726	6.19656	7.03765	6.99595		7.08837		2.62455	3.73433		7.26633	8.16694	7.58443	5.38934	1.53409
1995-12-01		2.0928		6.07353		8.94236	11.8713	4.90938			2.12344	4.16209	3.68825	2.42473	19.3495	2.07348	6.09814	5.65876		5		3.42046	2.86336	3.45139	9.60302	3.03703	44.6034	3.53021	1.81596
1996-01-01	3.125	0.625	0.763889	27.0933		3.21964	3.64583	4.14788	1.45833	1.04167	3.72204	1.41073	3.06198	33.7427	12.0774	1.65547	2.70193	2.38721	0.558719	0.8	3.75	2.29445	3.24928	52.7671	14.5161	1.4371	6.44647	5.37274	1.57944	3.75
1996-02-01	0.714286	1.74603	2.67857	38.7549		1.69562	5.01587	2.84523	0.1625		2.68442	1.8693	1.52054	29.137	13.7168	2.87683	2.65941	3.44266	1.43494	12.5	1.85614	1.1488	1.01049	36.9691	9.02191	1.22602	9.10624	7.29222	5.01663
1996-03-01		7.5	3.99489	54.8074		22.2876		4.81824			10	3.28344	3.24569	42.9644	11.6702	4.30945	3.7594	3.75086	2.7929	1.11111	2.77778	5.18136	1.03349	34.7175	14.8767	3.7788	2.33333	8.34033	10	2.85714
1996-04-01				47.0185		0.544753		13.8889			1.52979	2.53443	2.57889	33.0047	10.1596	2.9636	2.65813	9.80078	13	1.38889		3.29984	2.85714	8.3478	11.5439	8.5		3.65096
1996-05-01	1.39762	1.61035	1.02362	43.4831		15.7639	2.44748		0.333333		1.59533	2.00575	1.22317	31.0345	8.53612	2.08414	1.6376	7.00977		0.780899	1.51298	1.53746	0.125	20	11.5172	11.3333		2.67188
1996-06-01				54.8618		1.46575					2.51542	2.18694	2.23839	19.4534	5.26467	2.15689	2.12144	2.50296	0.757576	1.08156	5	8.57434		15.7	14.5513	1.52095		5.83498
1996-07-01			1.19786	50.7287		0.711253	1.75926	1.51577			0.707753	3.34501	1.87902	12.342	6.44653	1.58612	3.58876	2.49011	1.66667	4.08405	2.77778	3.28819		5.28861	12.1046	2.85714		5.79391		1.38889
1996-08-01				15							3.87058	1.82657	3.97222	7.68164	9.91877	5.70348	4.57321	5.02053			2.5	7.28484	1.36905	12.5	13.5895	27.5417	4	14.4444
1996-09-01						12.8571		6.25			2.30224	3.52069	3.25985	3.18842	10.9384	5.15056	4.85462	3.61184		6.98097	3.57143	5.58455			10.4647	15.8651	5.02731	38.0693
1996-10-01		1.11111	1.72743			9.07488	6.38889	5.15539		11.1111	3.86385	3.75503	2.39426		9.4141	4.30669	9.63661	10.0863	1.42857	2.5	1.85185	4.71976			11.6194	5.48364		2.27885	1.81667
1996-11-01			7.70833			5.08792		5.38611		7.14286	5.78023	4.0338	0.98757		11.7006	3.55543	1.85045	6.1675	6.5	1.14569	0.892857	3.29604	2.43236		31.9	4.22065	109.385	2.50326	2.28647
1996-12-01	6.94444	8.75	4.17857	22.1625		7.55869		11.5079		9.375	5.04241	4.34314	3.25866	9.50657	12.7466	3.94756	2.14048	4.48192	1.12419	5.25436	0.25	3.80866	0.744438	52.7095	15.1375	4.19006	2.29729	3.51429	1.9465	3.99537
1997-01-01				24.4045		1.97706		15.1045		2	1.83772	2.33108	3.22651	11.8616	9.97494	3.29584	2.30388	2.60645	2.90262	2.20645		2.05032	2.43256	13.4167	33.5222	1.10162	2.99271	3.85046	2.09908
1997-02-01	1.8	6.15241	2.08333	18.1512		0.283479	6.66667	2.30036		0.128898	1.28125	2.93672	3.60835	25.9031	14.0865	2.70178	4.52951	2.57753	1.94286	2.16667		2.28394	1.45443	37.432	27.5327	1.263	5.79067	3.47825	2.05854	2.62121
1997-03-01		19.5247	1.25	32.64		0.951672	3.15318	1.95906	3.125	0.276894	3.77796	3.81215	2.01052	35.6021	9.14941	1.35117	2.88726	1.42766	0.075	1	1.05787	3.71662	0.882648	53.08	15.3947	4.83349	5.4655	2.1286	1.20227	0.424893
1997-04-01	1.38889	5.34572		21.3503		0.642499	1.07143	1.58894		0.875	2.37544	3.68568	1.56038	14.7333	7.65747	0.856858	2.56801	1.93906	0.0151515	1.875	1.06314	2.58421	1.42959	83.3248	16.8897	0.577559	4.07532	2.38561	0.372396	1.08333
1997-05-01	3.66468	2.45404	1.76966	30.4525		1.48368	8.8966	1.65567		0.0555556	2.72489	2.80447	2.63653	38.7906	7.50396	3.27884	3.94043	1.6973		0.75	4.16667	7.062		24.6863	15.5592	7.01648	11.1111	0.822222	0.344444	0.555556
1997-06-01	1.77728	2.5	3.03691	20.7222		1.38813	2	2.49678	0.06875		3.10878	3.55162	4.05747	1.38889	11.6989	2.15006	25.7427	2.08407	1		1.18056	2.18678	1.05087	20.3416	12.7084	8.37242	1.46811	1.0519	0.232979	0.0625
1997-07-01			2.49909	35.1275		0.488013	4.28571	5.47619	7.54583		3.1314	3.00268	3.80926	6.49665	10.976	1.85163	2.40821	2.35863	1.02751	1.4419	4.30357	3.9712	1.39628	22.1205	15.2455	17.9856	5.20979	3.1473	4.36924	0.729167
1997-08-01		4.53333		20.9988		4.08873		7.76042	0.22449		3.24811	4.60643	3.38182	18.0372	9.1586	3.42456	3.33062	3.01762		3.57143	6.3423	5.04252	0.518016		12.5135	4.17616	4.43611	5.10827	2.7318	3.57143
1997-09-01				10		0.642857					9.04572	2.88935	3.95434	4.16667	14.4999	6.52778	5.33617	3.25241	3.05556	4.96667	4.84167	3.78859	4.99825	47.8308	12.7227	7.36349	3.42943	3.02658	5.65625
1997-10-01											6.43549	8.76689	5.15957	3.33333	19.7125	9.87727	5.66474	8.14751				6.20961	2.89693		10.9801	6.9262	7.31002	3.39158	4.22989
1997-11-01	1.25	6.08073	0.859375			4.76197	5.48077	6.38846			3.40579	2.95234	2.73403	19.6518	6.55287	4.6076	3.91062	4.95309				0.706226	2.27324		9.64463	5.17567	4.04618	3.75	3.83333
1997-12-01			6.86765			2.08333	1.78571	4.19118			19.1667	1.83602	11.3893	0.708333	18.3321	4.54619	8.03972	13.0326	1.45833		6.20833	1.69444	1.73875	13.4428	7.03057	12.2438	3.79808	4.14293	6.03568
1998-01-01	7.14286		4.21429	35.7549		4.79106	2.64286	3.82735			6.08138	5.50707	5.13412	9.80175	18.465	3.44792	2.01481	1.8188	4.83801	7.91667		3.7329	5.03823	19.425	9.87093	2.99123	8.06918	2.06664	6.63558
1998-02-01		4.28571	3.88393	25.1616		2.02159	2.5	3.91165	1.684		3.89101	5.93806	2.13926	18.8986	4.72489	3.28368	4.2839	4.38938	2.9167	2.84091		4.14247	2.30406	50	10.1249	4.38458	5.50397	2.45186	9.60526
1998-03-01				44.4463							4.63855	4.32401	2.98972	20.5007	3.43778	2.96984	11.4954	8.66695	18.2009	6.84167		5.2016	5.74054	9.2076	14.5688	1.39365	4.95139	2.04534	8.56712
1998-04-01	4.29367	7.15495	2.72953	24.1756		1.54907	3.27273	4.90094	1.54568		5.87041	5.8553	5.98141	12.5049	15.7301	5.88865	3.77613	4.88176	4.01819	4.12915		8.66305		16.8179	14.4276	7.5	11.6071	9.72222	11.8056	8.05556
1998-05-01		3.2498	1.51515	21.3709		0.993268	2.2723	4.85515	0.714286	3.4708	4.29569	11.8593	1.56308	22.2078	5.42398	3.06282	5.1859	5.30057	9.99502			4.71077	0.592806	27.9591	17.4794	3.45727	1.2469	4	2.17407	5.3125
1998-06-01	6.25893	3.48467	1.85824	13.5965		1.72988	3.20232	6.56396	2.46627	5.5	4.84883	2.6682	3.2904	12.7091	18.9118	2.77778	1.42765	2.29498	6.65385	4.07836		3.3975	0.393123	10.5327	14.3077	0.22752	1.62928	0.885742	1.36795
1998-07-01	4.30409	1.9909	1.35938	3.30128		8.1448	3.125	8.35735	0.692308		5.95082	4.6748	4.09375	16.6312	14.4844	7.26045	4.54835	6.64604	2.01389	9.9375		3.29696	0.701979		10.5874	1.32518	1.00905	1.56566	2.14534
1998-08-01	16.6667	8.33333	1.10417	26.5625		4.58462	5.625	8.89881	1.72917		6.00634	5.56526	5.57404	9.79344	10.9578	12.382	8.32594	7.51711	3.70691		2.09167	2.40118	0.652582		7.06472	1.3167	1.56534	5	1.01591
1998-09-01	6.25	38.4083	3.65625			10.2008	5.85313	14.7569			8.77722	4.38972	4.53045	4.35833	11.8059	8.80988	1.98611	4.86682	1.91303	5.25	0.375	2.87087	1.25287		5.31817	2.1259	2.72796	1.27026	1.16183	1.5
1998-10-01	4.11111	4.16667	4.44444			10.6817	1.7	3.50152		6.94444	6.08779	3.30055	2.01164		13.1144	8.01566	6.69468	4.56058	1.34995	9.53333	9.16667	4.16667				9	7.08333	5.625
1998-11-01		4.39583	4.42576			10.6574	7.5825	10.8184	7.29167		7.10417	3.82866	4.5	16.6667	10.754	5.47846	2.88333	8.97463	4.9375			2.45265	1.93883	8.75	6.74998	1.53928	1.60056	1.19689	4.58333
1998-12-01		4.69226	5	8.33333	1.76528	2.38268	2.50926	19.6856	20			13.2958	1.88889	10.6177	20.6096	5.10828	7.95945	5.96241	2.61407	4.66667		25.5				5.29722		4.72917	3.53333
1999-01-01		11.6667		22.4984		1.70607		6.60112	5.20833		10.8238	10.1372	3.80572	13.5265		7.10214	4.81981	9.73029	3.30989			22.5	1.70279	39.65	4.55005	2.31734		1.8209	2.62888
1999-02-01				22.2893		0.419125		4.51667	0.0111111		6.25	10.725	3.98264	23.3477		3.68378	3.79167	4.82646	6.53579	3.3125		57.2167	1.61558	23.0931	6.12867	2.10226		2.43416	3.02994
1999-03-01		10.0934	2.95146	24.621		1.00081	6.55931	8.47906	0.638889		3.33738	7.04299	0.745525	22.3819	23.1259	3.27259	5.04564	5.97606	4.94792	8.91667	0.25	3.79335	1.20777	32.2635	10.1451	0.873181	1.44552	0.802083	1.89296
1999-04-01		7.79221	5.33009	29.9372		2.97692	14.0332	11.1111			7.01472	6.44911	1.21316	15.6774	12.0623	2.03454	3.03266	5.88467	7.14339			2.92378	0.155461	17.7046	7.41578	1.18142	1.47241	4.6756	1.89492
1999-05-01	1.875	8.75	0.333333	21.0582		0.485552	1.02665	2.06511	0.03125	5	13.2292	10.4173		23.5129	13.2022	1.84876	6.22089	2.03897	6.28258		0.317885	2.54973	0.3125	18.4286	6.55427	0.512466	1.3101	0.949929	0.793532	1.19048
1999-06-01				15.8744		5.36185		4.59524	0.0714286		7.97278	4.72721	5.20833	27.7259	10.1988	4.91957	12.1398	8.86084			7.8125	3.91032	1.00223	20.4942	8.85624	1.02403	5.2483	7.38542	0.777778
1999-07-01	5.20833	1.04167		32.7449		2.0171		4.22142			3.77778	4.79973	1.98026	18.9629	6.64029	7.55741	3.99657	6.65759	1.72089					28.8077	14.7072	0.241056		3.125		2.10938
1999-08-01				16.7834	26.4875	1.38969		3.31857			1.03756	2.3292	2.2576	27.2778	8.89651	2.75813	2.28967	2.92264	1.80208	3.01814		7.43909		30.6344	12.134	8.57602	5.70833	4.86865
1999-09-01		14.4231		19.9497	17.7667	3.28577		2.95858			13.1435	5.24022	1.47659	21.975	7.45189	2.51545	10.1334	5.78964	1.16618	1.30144	0.90625	5.83429	1.575	24.2949	9.53706	7.46758	3.05	3.32855	1.94444	0.416667
1999-10-01		7.61482	6.54762	24.9291	23.6296	4.44302	9.52381	3.55214	2.5		12.6376	5.38847	2.47939	21	1.6966	3.8654	5.13708	5.49403	0.479167			4.236	1.38889	35.4167	15.95	5.045	1.77778	14.5833
1999-11-01		4.10995	2.40205	15.3545	3.10864	2.16561	3.26667	1.74214			6	7.89774	2.05137	13.8308	13.9889	4.43302	9.66539	4.41053	1.2	12.5		6.625	2.41667			5.13934	5.83333	8.16667
1999-12-01		9.33333		12.3108		9.61689		2.04244	4.41667			2.42222		69.5652	3.40554	3.50413	4.15127	7.27008	18.0357				2		10.5917	4.16667		8.88889	29.1667
2000-01-01						9.05					3	5.06488	0.681616		8.2561	2.73698	10.0982	0.555556	3.51562	0.583333		16.6667	1.5625			4.03233			2.98438
2000-02-01						6.4375					4.10137	3.91033	2.48269	11.9444	12.1208	3.23865	7.70946	6.24562	2.51264	2.38086		3.75	4		10.3281	6		3.5
2000-03-01		3.125		33.8571		3.33742	6.25	1.5625	1.03385	2.56667	4.27695	1.38499	1.33386	12.5852	11.2325	2.10419	3.691	2.28023	2.27778	1.8144	8.00459	5.13276	1.66667	27.8523	25.7834	0.325063	5.4382	4.25951	1.66667	2
2000-04-01				9.15515		1.15669			0.0354167		4.72906	3.36445	2.21833	17.4389	17.208	2.11338	3.49548	2.86535	1.55259	3.6669	4.7619	3.53473	1.37715	24.3078	1.97639	0.638889	3.06924	1.75		1.75
2000-05-01	1.92927	1.08134		14.7245		3.78443	0.377814	3.42977		0.277778	5.88261	3.99704	2.02813	25.1523	11.0134	3.36209	4.4512	4.63117	0.521103	3.62381	2.65302	3.54838	4.22565	19.3213	7.99602	13.6532	3.99308	1.47879	1.76689	1.5303
2000-06-01	5.24905	0.793651		9.95754		6.89056		1.86907			4.65109	2.20049	0.575985	12.278	5.23723	8.05082	2.60686	1.52345	0.851562	0.813362	1.89327	1.39005	1.19048	19.4069	7.79021	14.8943	2.6625	2.99255	1.70833	0.669643
2000-07-01	5.54602			21.8974		4.72213		7.11462			2.81333	2.92409	2.35671	9.27058	7.92887	7.789	8.88299	3.11124	1.7	2.44048	1.61627	0.932087	1.35129	28.5974	9.88889	35.1631	1.67541	4.82756	1.83333
2000-08-01	1.77778	0.148148				3.14815		5.44444	0.925926	0.111111	3.87503	1.26252	1.2009	10.1394	3.17457	3.17153	2.81199	5.12922	0.653812	0.720833	7.8578	6.08511	0.761905		11.5746	11.2629	4.37855	8.05432	0.666667
2000-09-01		2.62963	0.923611			2.15857	4.51389	3.47222	2.01852		2.44361	5.32855	2.59008	22.3719	4.5997	3.40774	5.94571	2.66777		7.11815	6.13091	8.70025	1.2362		15.375	5.85973	3.30949	2.67641	3.1875	20
2000-10-01	16.8899		2.70833			5.89697	3.33333	9.4494	1.71429	1.33333	14.1246	3.09407	2.73882	7.23429	10.4447	6.53605	3.56342	8.77616	1.26829	1.60177	9.54332	5.69938	1.088	48.9601	5.31666	4.10796	8.04038	4.21892	1.62574	0.142857
2000-11-01	6.25	3.86951	1.4838	2.5		1.52468	8.85417	2.53125	1.2037	7.07237	10.8974	4.4396	2.17477	22.7861	14.5275	5.02694	5.21799	5.14106	0.731854		3.31553	2.26466	0.940476	55.3125	21.1995	6.82717	6.29537	3.815	1.42618
2000-12-01	16.6667	2.21626	4.02026	13.0301	7.83394	6.25594	38.3775	5.02533	5.02663	3.75	6.27526	2.44759	3.36359	14.8269	15.5139	7.32429	13.3982	4.65311	2.02436	2.86269	5.76863	8.42131	4.78108	59.7808	13.0463	7.01618	10.8463	11.2319	3.56381	10
2001-01-01		1.35367	4.44574	41.6232	20.8554	2.78842	6.06412	8.39889	4.58004	0.5	11.0749	12.9	3.21335	8.42615	10.2398	12.9834	5.08405	7.20647	5.5731	2.68055		10.7255	1.18059		11.8803	6.58209	9.04882	2.51964	2.65263
2001-02-01		2.46733	2.78963	5.99731	14.1771	5.86211	3.92052	2.579	1.67916		3.61228	1.73577	3.72535	3.10901	21.6639	6.73948	1.33656	4.81086	5.39025	4.16667	0.392857	3.95113	3.13552	13.8889	16.8384	12.5386	1.84939	3.25168	2.07676
2001-03-01	8.33699	5.18971	1.3409	22.3899	5.49751	9.19516	2.84686	1.79291		0.6	4.28761	2.82323	2.75984	8.97812	6.28972	7.57294	3.58289	4.35543	1.55743	0.960532	1.15182	2.29981	0.765609	23.485	4.92738	10.7043	3.35592	5.28278	2.05304	0.711757
2001-04-01	4.24424	6.82037	0.509533	17.0456	3.17408	5.26628	3.2138	2.0906	0.956599	1.66667	5.39481	2.55239	1.50198	6.89512	11.155	4.23551	4.56547	2.66868	0.17204	1.22329	5.1904	3.82929	1.51408	35.4896	8.42593	11.5451	2.73684	2.18524	1.07277	1.57927
2001-05-01	2.99987	1.79265	1.15021	11.2001	10.4079	5.20096	4.50979	2.28983	1.55952	1.24856	5.14565	4.07565	1.75776	6.90616	4.43354	5.77312	2.9811	2.64598	1.15	0.953127	4.54137	2.50426	1.27153	21.506	11.1028	6.90624	1.93866	2.62488	0.981574	1.07167
2001-06-01	7.14726	1.79502	0.600717	14.3042	11.8516	10.667	1.01629	2.44808	0.288971	0.625411	4.83394	2.23357	1.22018	7.67538	8.72633	6.24677	2.49064	2.75778	7.72442	0.416667	3.21205	2.40795	0.56188	16.1525	24.4829	6.73005	1.35684	1.94685	3.53696	0.485545
2001-07-01	6.07212	1.4065	1.50247	9.64336	15.318	4.92499	5.81204	3.78791	1.84791	1.00631	7.22809	1.30524	1.42518	9.31488	8.6153	6.44215	3.25388	4.84247	0.638454	1.12766	3.13105	1.58433	1.61013	25.4398	16.4137	13.9546	4.2147	5.01415	1.3728
2001-08-01	2.51249	1.58652	0.882208	13.0469	14.0927	6.98846	3.40352	2.39295	0.992034	0.357143	9.15413	2.1198	1.5238	12.8646	6.71702	6.2818	2.98277	3.61833	1.63717	3.86802	8.23138	1.94437	1.77291	20.849	15.8768	6.42143	3.61827	5.96955	1.52113	0.595438
2001-09-01	21.1495	1.54194	0.97905	17.2786	8.2	4.3886	1.31964	2.24428			12.4495	5.58507	3.74377	42.1687	8.41002	6.29259	36.2685	4.39121	1.68466	1	14.4955	0.909478	0.313236	26.3569	19.3806	8.14452	3.35085	2.05383	1.01416
2001-10-01	11.2455	4.83807	5.28956	35.3064	4.14667	9.87758	5.72086	4.9552	1.54645	13.3333	10.1352	4.88155	3.68846	10.973	7.11793	7.43411	7.26837	0.72958	0.293405	12.5236	6.73461	2.36629	4.1393	14.3211	10.1794	15.0191	7.26969	3.58694	0.935057
2001-11-01	1.66667	5.34059	1.63852		7.26249	6.75123	5.51152	5.40986	4.57621		10.2884	1.44974	2.81771	11.4813	7.95634	3.31448	1.76267	5.46419	4.15668	2.18797		1.36667	3.2802		15.6205	6.4367	3.61553	6.09749	0.448959	1.11111
2001-12-01		2.10268	2.33648		10.7131	5.15677	3.9834	3.4623	9.37806	5.19608	6.01675	2.35926	0.379732	4.33333	14.7972	7.56211	2.46846	2.21505	1.0109	2.36479	3.43699	3.22772	2.50989	2.16667	17.3893	1.96066	5.26369	4.20865	1.9375	1.45
2002-01-01		2.25	7.2903	19	5.21039	7.06394	9.05266	2.81018	1.80218		5.14314	2.99866	2.56972	23.7805	15.6139	6.51516	1.70096	3.38637	2.03846	1.52319	4.85	3.25538	2.71724	4.75	18.5232	6.30382	2.31459	4.10688	2.44164	16.6667
2002-02-01	5	3.79869	3.30341	4.27778	6.29379	1.18731	3.65512	2.09919	5.28182	0.6	2.72553	1.53462	4.17485	7.09981	7.55794	8.04254	3.3699	3.13325	1.33351	0.830065	2.625	5.70348	3.55252	23.7673	8.21695	3.40426	5.4502	7.65447	3.8158	5
2002-03-01	3.57143	6.76109	0.886613	32.1769	3.14346	13.0923	5.08637	3.11015	1.72371	1	5.15649	8.63985	3.17335	35.0217	18.6156	4.80728	2.42376	4.60234	1.62423	1.72335	9.73817	3.24804	1.61619	15.8924	15.6856	8.49592	3.11136	3.13867	1.51165	2.43571
2002-04-01	5.69245	14.847	16.6667	19.7358	14.4489	4.28084	9.34069	5.63249	12.25	0.89176	2.76422	5.05847	3.51112	14.9819	11.4781	10.7606	3.3042	4.58332	1	1.76907	6.48152	2.06319	1.35556	22.2822	10.8872	11.9645	2.01931	3.62456	1.11029	9
2002-05-01	5.83472	8.77451	48.4643	11.2917	10.2403	4.93467	6.27778	4.44372	0.0357143	1.88145	3.85149	1.82406	0.733533	13.766	7.65415	4.78213	0.746634	2.18538	0.896081	0.460569	2.18376	3.42891	2.49358	2.41206	14.7817	13.7002	3.06253	1.76888	0.676826	1.54762
2002-06-01	4.15211	1.54864		18.1809	9.76155	2.82956	0.701736	4.71673	0.391511	0.906632	7.3369	2.48188	1.5756	16.4658	13.9892	4.28831	0.707786	2.29126	0.526511	1.58961	2.50437	3.54489	1.50565	19.5811	11.7577	7.53047	0.489672	2.08745	0.22332
2002-07-01	3.14	2.72204	3.39375	18.7421	5.15195	6.32436	1.3417	3.05921	0.153197	1.58333	5.90056	1.6801	2.04054	28.8341	8.35842	15.1396	2.37002	1.65629	0.546226	1.11111	1.17982	2.14286	0.704164	19.1583	21.1815	11.9441	2.27813	2.15786	0.277586	62.5
2002-08-01	3.79827	3.31025	0.841123	27.9534	9.9422	6.01756	1.61251	5.52544	1.30348	2.4267	6.10486	4.80745	2.42606	11.1273	11.5689	2.0506	2.84051	5.14165	0.586992	3.33333	3.13508	1.78788	1.21264	7.73378	13.3791	21.2421	2.26894	6.12228	2.15228
2002-09-01	9.12166	12.8325	1.62551	37.1895	3.92917	3.95979	2.8313	5.9337	0.9375		9.16332	3.58217	2.00645	8.0007	18.0514	4.68358	3.36441	5.79098	2.66548	10.625	6.16419	3.69016	1.6944	3.38095	27.4453	12.3099	3.03953	6.60929	2.70325	2
2002-10-01	6.5341	4.69184	0.702172	41.4824	6.51185	2.62312	1.43076	4.71977	2.08333	5.66667	7.25575	4.96205	2.29765	5.09523	9.38813	4.47656	3.12091	5.74834	2.03328	3.7673	7.85214	3.85558	2.8451		13.5838	6.07378	4.86996	4.23502	2.46295
2002-11-01	4.16667	3.67001	2.71881	3.33333	11.6749	2.54005	8.4328	6.09275	0.965017		8.5525	4.28211	3.0583	3.1746	10.5086	5.0179	3.57125	7.68417	1.69792	27.1453		1.37531	2.00422		8.42692	2.04048	1.89452	1.23775	1.98027
2002-12-01	3.80005	3.04628	1.44167		9.68726	7.05243	2.52182	4.29079	3.07806		3.86651	1.26523	2.37576	1.16667	22.5893	2.62812	1.46348	3.70798	2.40906	1.66667		13.2084	3.61324		20.1002	4.74299	3.94283	2.18914	3.43374
2003-01-01		1.95	2		9.19782	5.35515	2.25	4.12334	2.37924		2.87492	4.10753	1.49566	1.11111		3.45098	3.55384	10.8163	3.00857	1.33333		5.44287	5.31999		24.8285	2.404	5.30018	3.7707	2.09256	1.25
2003-02-01	2.5	2.42998	1.66667	6.29039	11.6777	3.57794	2.46125	2.86444	30.5153		2.116	2.33333	2.94582	1.49424	13.8182	3.11917	3.56077	5.94157	0.409761	1.1		2.26052	2.87816		19.6108	3.16809	0.982897	1.08214	0.832574
2003-03-01	10.6074	6.66333	3.16667	24.5024	24.4942	4.18171	2.92222	5.40929		3.83333	3.20855	2.01775	1.43707	16.2327	16.0637	1.79036	2.63387	3.42837	0.765257	1.79205	3.14661	1.29848	1.17518	32.9761	19.2496	6.53054	2.02441	1.9296	1.13342	1.06242
2003-04-01	4.63166	3.34998	0.828619	10.2822	6.89158	5.25717	2.6305	3.19756	1.2043		4.10955	2.06121	0.912604	17.7724	13.5781	4.04584	1.62227	3.0355	0.678805	4.27315	0.25	3.83926	1.74302	6.56683	16.9096	10.3205	3.11542	1.79105	2.58077
2003-05-01	4.12415	8.50878		22.4859	15.995	1.78121	1.75894	4.42745	1.5		5.54215	4.06334	1.77501	17.3216	6.4532	0.985446	2.28819	4.20222	0.948751	3.76956	2.24306	3.02428	2.53414	23.3907	17.3604	4.12891	0.440837	3.58168	3.71386	1.08929
2003-06-01	11.9048	1.32668		33.1088	10.6463	2.95758	0.315259	4.02694	0.0694444	4	3.41189	2.38325	1.5033	9.70951	6.97406	4.61949	2.70802	1.26469	0.940695	0.872836	26.7917	3.19551	1.5219	13.2675	17.7396	5.02591	0.522039	2.66131	2.01237
2003-07-01	8.89246	1.51653	0.95503	24.0493	4.18079	3.94165	1.77785	4.02071	3.1995	0.464001	6.28767	2.50674	0.94714	11.9457	4.83352	11.2688	4.52325	2.08132	1.08299	0.593691	4.8293	1.14486	1.52399	15.9238	14.3477	17.404	2.76888	3.1859	0.720007	0.5437
2003-08-01	12.0493	1.51561	2.54023	21.8933	11.8854	6.18042	1.55417	4.5618			10.1105	3.9555	1.71664	7.67565	8.62808	10.4149	0.976157	3.98689	0.441025	3.92996	4.98512	3.19242	0.751975	15.4762	14.91	5.59126	3.1908	6.96131	1.33801
2003-09-01		28.7718	20.1667	51.0163	21.8667	6.13933	3.83333	6.125	5	2.16667	5.66278	4.20331	1.75611	4.53444	7.30097	6.90556	2.13809	4.33756	1.42361	3.87401	3.15356	4.6305	0.911589	4.09046	4.76459	4.74622	1.56427	4.58337	3.17695
2003-10-01	28.2407	2.43333	1.875	61.7043	9.21555	20.0923	4.21952	6.36967	6	4.45833	8.14629	2.53329	2.14658	6.61551	9.20802	3.94956	2.35525	5.06446	0.797522	8.94865	20.0817	6.38006	2.72114	51.4068	14.279	7.90537	4.29686	4.20238	1.85473
2003-11-01			5.76129		11.5976	2.87064	7.66013	3.01884	12.6389		6.63606	1.35294	3.52481	3.375	11.2136	1.75479	6.20969	5.19025	0.659854	1.02778	9.08333	3.39308	44.6754	57.1429	15.2435	5.48053	7.14546	17.1749	2.13361
2003-12-01	2.25		3.6686		8.47334	2.26313		2.10242	1.91032	17.8571	3.81121	2.38683	3.70837	2.99804	12.3091	1.23306	1.87799	7.95055	0.616667	1.65278	4.6721	3.10949	3.72324		17.3742	3.56191	2.43117	7.23137	0.551331
2004-01-01		2.55734	4.35585		6.24815	5.0613	5.98462	2.74911	1.73914		18.7648	2.23183	2.56262	1.66667	13.7233	2.54481	3.79161	5.19179	5.55509	3.96925		3.90753	2.0563		19.0601	2.82932	4.44111	1.36111	5.68085
2004-02-01		7.49265	3.125	30.2083	15.4233	6.25	8.125	3.66158	5.62754		3.34377	2.17443	2.57029	2.63694	14.1993	7.91276	2	9.60047	2.5	1.3006		2.99356	1.19616	2.08333	15.9475	5.51097	1.64318	6.7232	0.716667
2004-03-01	4.5	3.02916	4.23485	42.6739	6.44584	13.9992	1.25	2.69293	2.41667		6.14371	4.86288	1.76439	31.5735	21.2711	5.74367	3.2	3.92418	0.948541	5.61657	5.83333	5.60666	3.07163	36.29	19.3437	3.17951	5.41827	6.09888	1.875
2004-04-01	1.875	6.07754		24.6687		0.605929		7.5		4.16667	6.95401	2.01379	1.42063	7.68629	14.902	3.83457	1.42616	3.74884	0.765395	1.83503	1.70116	3.14333	1.07677	11.7205	14.0789	2.2542	2.46847	3.03137	1.07169	10.8333
2004-05-01	8.48551	1.15732	2.07757	38.8495	17.1375	2.37308	3.21528	2.43085		12.9286	9.29329	2.79145	1.82236	4.76287	6.03171	1.06099	3.93762	4.75471	1.69947	1.99886	3.71536	1.99896	3.2224	15.0877	14.411	3.88569	2.04229	2.97745	0.0428571	2.22222
2004-06-01	9.33684	4.19874	3.78929	23.5198	21.6486	6.17066	3.2	5.53163	11.4688	2.8125	6.24959	2.10424	2.49679	10.7405	14.6122	6.24279	1.48565	2.97984	0.274597	4.4425	2.28087	1.6138	1.93026	13.5883	25.8514	2.08601	1.36641	3.18866		1.78571
2004-07-01	9.08039	1.40739	1.53835	20.5952	14.8333	5.17957	1.09788	4.25124			8.57406	1.96955	1.87866	6.94117	13.3433	7.29359	1.37136	4.87034	0.173068	2.30698	7.30072	2.85179	1.75675	5.6026	34.6186	16.7405	4.73697	2.52467	2.63333	2.475
2004-08-01	11.8938	4.41719	2.28796	21.0334	5.52222	1.65346	2.13782	5.17157	0.329861	2.83333	8.2883	2.60733	1.71925	10.4564	16.3821	3.31394	0.946296	3.28214	6.5625	2.38588	5.68261	4.74157	2.32775	12.2933	14.927	28.0319	1.19673	4.58017	3.87787	1.975
2004-09-01	17.8571	40.619		22.0229	3.41667	5.64583	6.66667	10.7013			9.10382	1.33301	2.28373	11.9198	17.1175	4.67325	1.89657	4.26403	9.92864	4.72246	4.16473	3.59837	1.03813	35	22.3393	1.92258	1.22141	1.56359	2.69854	0.648214
2004-10-01			3.33333	18.727		1.33333	2.66667	3.83333			6.43131	4.28947	2.35462	2.62217	19.9114	3.38822	2.71875	3.55087	6.175	6	5.60299	3.44466	4.76732		20.9603	6.89875	2.07831	3.66887	1.07113
2004-11-01			13.25	14.9723		2.83333	4.16667				4.69398	5.61162	4.46709	13.6364	23.6063	8.20854	1.875	6.65008	2.1103	7.78819		7.71843	3.92857		20.846	7.3548	1.75144	2.98058
2004-12-01						6.30788			3.83163		0.916667	1.62863	2.625		31.775	1.77976		6.65855	1.17667			1.5105	1.01013		17.5569	5.18546	1.43471	1.47996	3.01688
